# Supplementary material
Source: publisher figshare collection journal article supplement (https://sage.figshare.com/ndownloader/files/12440630)

# Supplementary Material

Supplementary figure S1 : Bland-Altman analysis for the whole sequence. Active energy expenditure (AEE) measured by Actigraph and Metamax (MM3) for the whole test and for each task respective of ambulant (A) and wheelchair-bound patients (B);

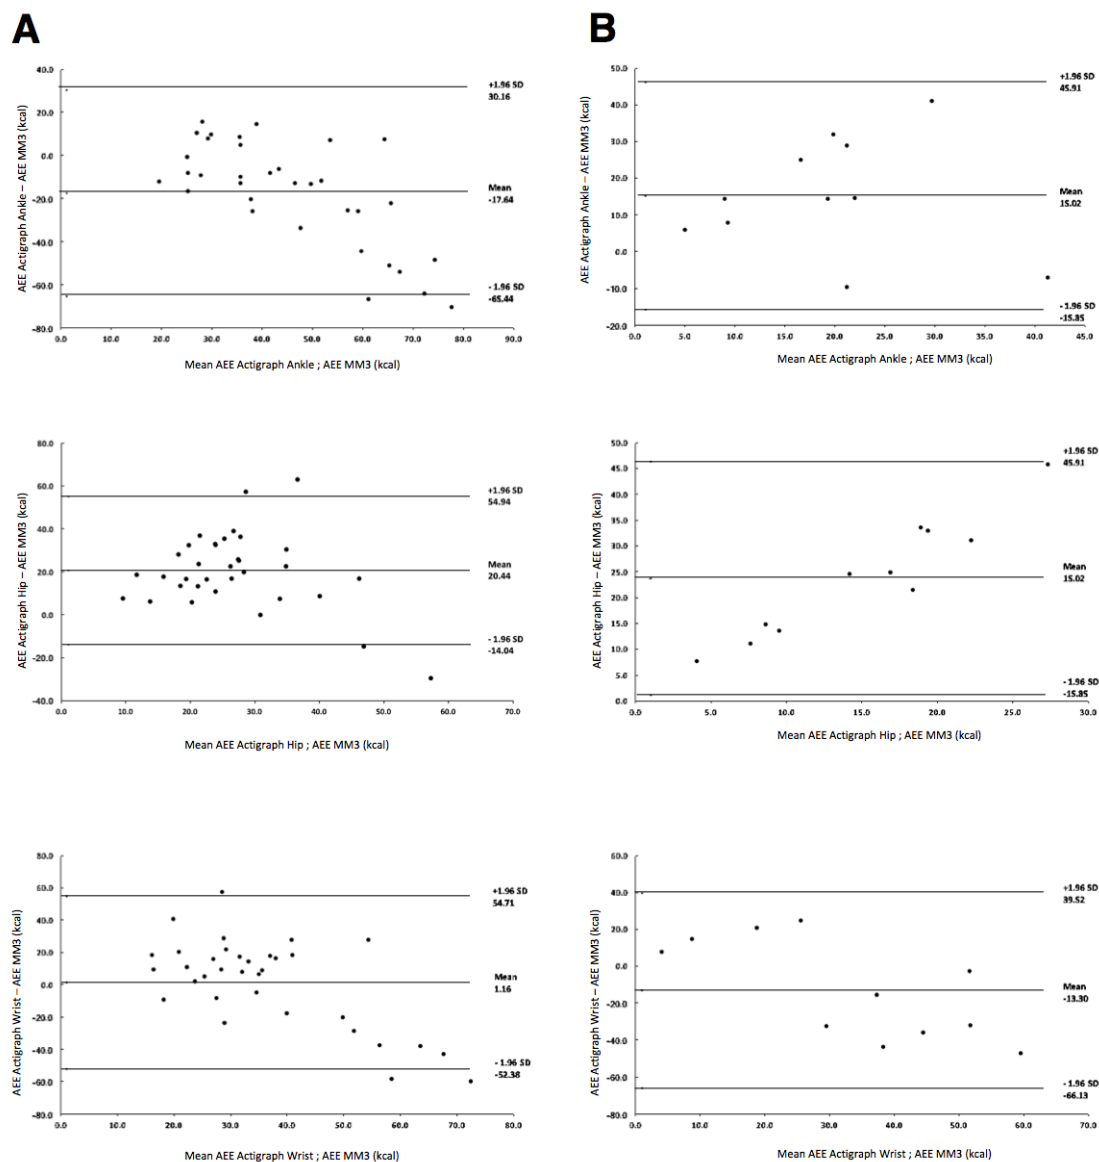

Supplement: Supplementary file 1 [file 12440630]
